# Supplementary material for: Anti‐tumor efficacy of human anti‐c‐met CAR‐T cells against papillary renal cell carcinoma in an orthotopic model
Source: PubMed Central journal article supplement — Cancer Sci. 2021 Feb 24;112(4):1417–28. doi: 10.1111/cas.14835 (PMC8019206; doi:10.1111/cas.14835), 2021-02-24
Supplement: CAS-112-1417-s001.pdf [file CAS-112-1417-s001.pdf]

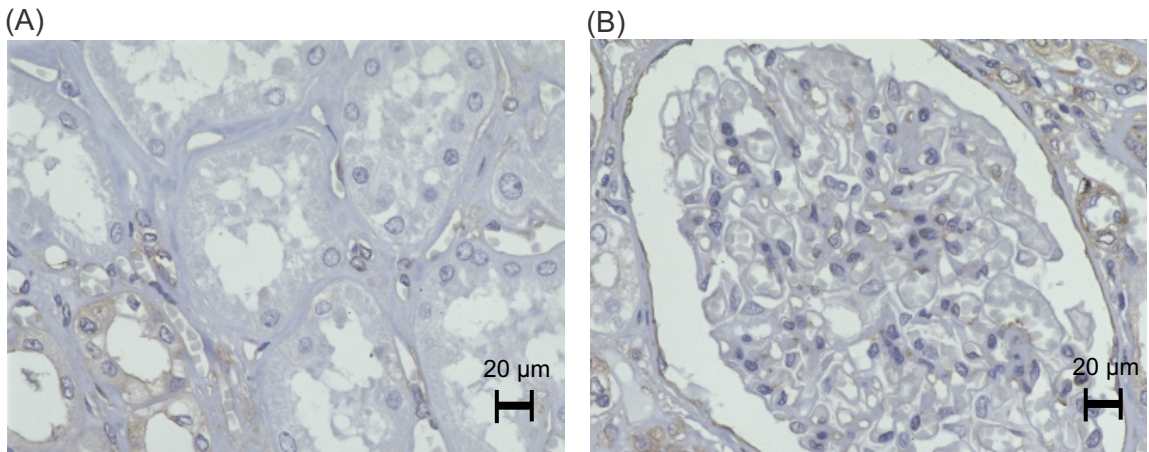

**Figure S1. Faint expression of c-met in normal kidney tissues.**

Images of IHC for c-met in the normal tissue areas of clinical samples of PRCC are displayed. (A) The area of renal tubules and of (B) glomeruli are exhibited. Representative images are shown.

**Figure S1**

(A)

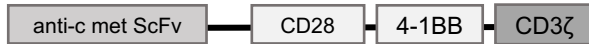

(B)

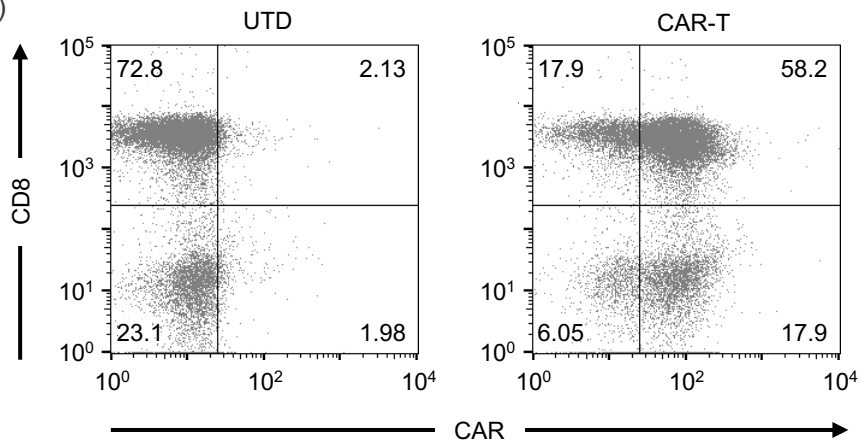

(C)

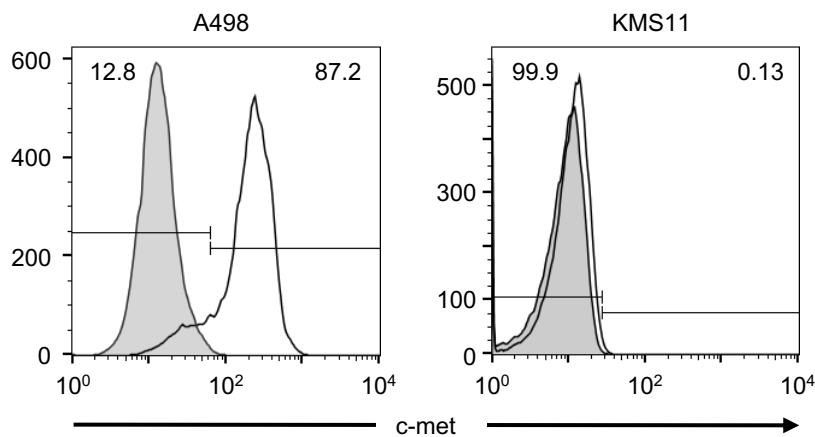

**Figure S2. Generation of anti-human c-met CAR-T cells.**

(A) Schematic representation of CAR against human c-met. (B) Human peripheral blood T cells transduced with the CAR were stained with recombinant human c-met fusion protein, along with anti-CD8 Ab. UTD-T cells were examined as a control. The percentage of cells in each quadrant is indicated. (C) The expression levels of c-met on A498 or KMS11 were analyzed by flow cytometry. No stained controls are depicted in gray. The percentages of positive or negative populations are indicated.

**Figure S2**
